# Supplementary material
Source: publisher figshare collection journal article supplement (https://gsapubs.figshare.com/ndownloader/files/23307158)
Supplement: Supplementary file 1 [file 23307158]

## Sheet: Table DR1
Silva-Tamayo, J.C., Lau, K.V., Jost, A.B., Payne, J.L., Wignall, P.B., Newton, R.J., Eisenhauer, A., Depaolo, D.J., Brown, S., Maher, K., Lehrmann, D.J., Altiner, D., Yu, M., Richoz, S., and Paytan, A., 2018, Global perturbation of the marine calcium cycle during the Permian-Triassic transition: GSA Bulletin, https://doi.org/10.1130/B31818.1.
GSA Data Repository Item 2018081
Table DR1: Element and isotope composition of the studied carbonate successions
Sample	Location	Strat Hight	Srat. Unit	Age	Lithology	d13C (PDB)	d18O (PDB)	d18O (PDB)*	d44/40 Ca (SRM915a)	2STD	N	[Sr] ppm	Sr/Ca	Mg/Ca	Mn/Sr
PDJ-001	GBG	0	Dajiang Fm.	Changsingian	PG	3.18	-3.77	-3.77	0.465867	0.465867	3
PDJ-009	GBG	9	Dajiang Fm.	Changsingian	PG	3.53	-2.68	-2.68	0.40665	0.40665	3	504	0.0013449	0.00431888	0.118056
PDJ-017	GBG	17	Dajiang Fm.	Changsingian	PG	3.23	-4.78	-4.78	0.58	0.58	3	473.5	0.00127818	0.00213794	0.17529
PDJ-026	GBG	26	Dajiang Fm.	Changsingian	PG	3.02	-4.05	-4.05	0.71	0.3	3	432.5	0.00108491	0.00334504	0.186127
PDJ-030	GBG	30	Dajiang Fm.	Changsingian	PG	2.52	-5.15	-5.15	0.29	0.29	3	444.5	0.0011556	0.0126089	0.312711
PDJ-033	GBG	33	Dajiang Fm.	Changsingian	PG	2.88	-3.44	-3.44	0.445167	0	3	445	0.00126223	0.0596086	0.333708
PDJ-040	GBG	39.7	Dajiang Fm.	Changsingian	PG	2.22	-5.31	-5.31	0.3486	0.1	3	802	0.00218618	0.0220363	0.109726
PDJ-044	GBG	43	Dajiang Fm.	Changsingian	TH	0.95	-4.01	-4.01	0.23	0.2	3	444	0.00126083	0.0811728	0.614865
PDJ-046	GBG	44.5	Dajiang Fm.	Changsingian	TH	2.07	-2.7	-2.7	0.19	0.19	3
PDJ-050	GBG	47	Dajiang Fm.	Griesbachian	TH	0.37	-4.48	-4.48	0.13	0.3	3	433	0.001243	0.0546146	0.579677
PDJ-053	GBG	50	Dajiang Fm.	Griesbachian	TH	0.03	-4.22	-4.22	0.08	0.3	3
PDJ-055	GBG	51.6	Dajiang Fm.	Griesbachian	TH	0	-6	-6	0.13075	0.13075	3	508	0.00138269	0.0108329	0.425197
PDJ-058	GBG	54	Dajiang Fm.	Griesbachian	TH	0.54	-3.94	-3.94	0.26	0.26	3	397.5	0.00127978	0.101159	2.56352
PDJ-061	GBG	56.4	Dajiang Fm.	Griesbachian	TH	0.66	-4.04	-4.04	0.2444	0.2444	3	412	0.0012875	0.0776562	2.01456
PDJ-064	GBG	57.4	Dajiang Fm.	Griesbachian	TH	1.43	-4.71	-4.71	0.454	0.454	3	478.5	0.00154629	0.0847794	0.725183
PDJ-068	GBG	60	Dajiang Fm.	Griesbachian	MS	1.87	-5.32	-5.32	0.13	0.13	3	595.5	0.00170533	0.008813	0.0957179
PDJ-072	GBG	64	Dajiang Fm.	Griesbachian	MS	1.7	-4.4	-4.4	0.25	0.25	3	724	0.0019557	0.0208779	0.196133
PDJ-075	GBG	66	Dajiang Fm.	Griesbachian	MS	2.31	-4.47	-4.47	0.17	0.17	3	961.5	0.00268538	0.00408323	0.0348414
PDJ-080	GBG	70.1	Dajiang Fm.	Griesbachian	MS	2.19	-4.92	-4.92	0.23	0.23	3	1463	0.00411649	0.00435144	0.00888585
PDJ-081	GBG	71	Dajiang Fm.	Griesbachian	MS				0.21	0.21	3	560.5
PDJ-090	GBG	80	Dajiang Fm.	Griesbachian	MS	2.29	-4.4	-4.4	0.22	0.22	3	1451.5	0.00382275	0.00249802	0.0757837
PDJ-100	GBG	87.6	Dajiang Fm.	Griesbachian	MS	2.43	-2.82	-2.82	0.12	0.12	3	315.5	0.000859907	0.00907877	0.251981
PDJ-107	GBG	93.8	Dajiang Fm.	Griesbachian	MS	2.396	-3.436	-3.436	0.2	0.2	3
PDJ-115	GBG	100.4	Dajiang Fm.	Griesbachian	MS	1.96	-6.08	-6.08	0.49	0.49	3	271	0.000767705	0.0509915	0.343173
PDJ-118	GBG	103	Dajiang Fm.	Griesbachian	MS	1.8009	-4.661	-4.661	0.58	0.58	3
PDJ-127	GBG	118.2	Dajiang Fm.	Dinerian	MS	2.821	-2.943	-2.943	0.88	0.88	3
PDJ-132	GBG	131	Dajiang Fm.	Dinerian	MS	2.823	-1.927	-4.527	0.77	0.77	3
PDJ-140	GBG	156.2	Dajiang Fm.	Dinerian	OL	1.71	-4.43	-7.03	0.61405	0.61405	3	150.5	0.0007	0.5	0.355482
PDJ-148	GBG	176	Dajiang Fm.	Dinerian	OL	1.71	-4.43	-7.03	1.0637	1.0637	3	214.5	0.000953757	0.519787	0.4662
PDJ-162	GBG	207.5	Dajiang Fm.	Dinerian	PS	1.105	-4.887	-4.887	0.82	0.82	3	597.5	0.0009	0.5	0.0987448
SQD-9	Saiq	198	Saiq Fm.	Dinerian	PS	2.41822	-2.7745	-5.3745	0.9	0.1	3	54	0.000195331	0.912603	2.73781
SQD-8	Saiq	190	Saiq Fm.	Griesbachian	PS	2.32023	-3.72051	-6.32051	0.95	0.13	3	66	0.00022829	0.928474	2.97112
SQD-7	Saiq	182	Saiq Fm.	Griesbachian	PS	2.7692	-2.5525	-5.1525	1.24	0.2	2	77	0.000246544	0.90126	3.06428
SQD-6	Saiq	174	Saiq Fm.	Griesbachian	PS	2.32023	-3.72051	-6.32051	0.95	0.14	4	71.7	0.000229115	0.924156	2.77247
SQD 5	Saiq	166	Saiq Fm.	Griesbachian	PS	2.68221	-2.4795	-5.0795	0.65	0.1	3	71	0.000206684	0.916824	2.93384
SQD 4	Saiq	158	Saiq Fm.	Griesbachian	PS	3.09718	-2.1015	-4.7015
SQD-3	Saiq	150	Saiq Fm.	Griesbachian	PS	2.38822	-1.7985	-4.3985	0.8	0.1	3	72	0.000225544	0.913464	2.74039
SQD 2	Saiq	143	Saiq Fm.	Griesbachian	PS	1.54527	-1.03549	-3.63549	0.7	0.1	3	77	0.000254124	0.911705	2.91746
SQD-1	Saiq	133	Saiq Fm.	Griesbachian	PS	1.88125	-2.6715	-5.2715	0.85	0.132	3	53	0.000206014	0.897359	3.05102
SQC 27	Saiq	130	Saiq Fm.	Changsingian	BRCA	0.8	-2	-4.6	0.47	0	2		0.000206904	0.868462	2.60539
SQC- 22	Saiq	125	Saiq Fm.	Changsingian	PS	1.2	-2.3	-4.9	0.61	0.12	3
SQC-21	Saiq	124	Saiq Fm.	Changsingian	PS	2.7102	-2.4805	-5.0805	0.95	0.2	4	57.03	0.000289238	0.926202	3.14909
SQC-18	Saiq	121	Saiq Fm.	Changsingian	PS	2.97319	-3.37851	-5.97851	1.13	0.1	2	40.63	0.000273383	0.943561	2.83068
SQC-14	Saiq	105	Saiq Fm.	Changsingian	FS	3.33217	-2.5485	-5.1485	1.19	0.1	3	45.13	0.000272535	0.935611	2.99396
SQC-10	Saiq	85	Saiq Fm.	Changsingian	PS	3.08018	-2.6335	-5.2335	1.02	0.1	3	41.3	0.000292133	0.950966	3.23328
SQC-9	Saiq	80	Saiq Fm.	Changsingian	PS	4.89907	-2.1985	-4.7985	1.11	0.1	3	0.01	0.000175996	0.916515	2.74954
SQC-5	Saiq	40	Saiq Fm.	Changsingian	PS	4.69908	-2.2055	-4.8055	0.69	0.1	3	1.8	0.000200971	0.869168	2.78134
SQC 2	Saiq	10	Saiq Fm.	Changsingian	PS	4.5	-2.3	-4.9	0.72	0.1	3	5.3	0.000249801	0.89605	3.04657
SQC 1	Saiq	0	Saiq Fm.	Changsingian	PS	4.3571	-3.76651	-6.36651	0.89	0.1	3	18	0.000234048	0.906096	2.71829
CAF2	Geomar								1.4	0.1	15
0	Taskent	0	Çekiç Dağ Fm.	Changsingian	PS	5.11287	-5.08433	-5.08433	0.62	0.05	3
6	Taskent	6	Çekiç Dağ Fm.	Changsingian	PS	4.77833	-6.85474	-6.85474	0.52	0.1	3
7	Taskent	7	Çekiç Dağ Fm.	Changsingian	PS	4.4703	-6.03612	-6.03612	0.32	0.11	3	700	0.00149492	0.0083566	0.066935
10	Taskent	10	Çekiç Dağ Fm.	Changsingian	PS	4.8289	-6.11117	-6.11117	0.25	0.05	3
16	Taskent	16	Çekiç Dağ Fm.	Changsingian	PS	4.03956	-6.05886	-6.05886	0.26	0.2	3
18	Taskent	18	Çekiç Dağ Fm.	Changsingian	PS	4.24293	-6.43186	-6.43186	0.4	0.1	3	607.02	0.00118558	0.0268028	0.194765
25	Taskent	25	Çekiç Dağ Fm.	Changsingian	PS	4.6	-4.57934	-4.57934	0.2	0.2	3
35	Taskent	35	Çekiç Dağ Fm.	Changsingian	PS	3.77404	-5.75831	-5.75831	0.09	0	3	869.1	0.00165499	0.0128706	0.0617778
37	Taskent	37	Çekiç Dağ Fm.	Changsingian	PS	1.61059	-5.93937	-5.93937	0.36	0.1	3	1287.34	0.002631	0.0128002	0.0669769
40	Taskent	40	Çekiç Dağ Fm.	Changsingian	PS	3.99274	-5.27211	-5.27211	0.01	0.2	3
44	Taskent	44	Çekiç Dağ Fm.	Changsingian	PS	2.25014	-6.46159	-6.46159	0.19	0.2	3	618.37	0.00134458	0.0083034	0.0983836
47	Taskent	47	Çekiç Dağ Fm.	Changsingian	PS	3.61264	-5.9895	-5.9895	-0.01	0	3
47.5	Taskent	47.5	Çekiç Dağ Fm.	Changsingian	PS	2.98074	-5.92986	-5.92986	0.28	0	3
48	Taskent	48	Çekiç Dağ Fm.	Changsingian	PS	1.7	-7.27612	-7.27612	0.02	0.05	3
0.03	Taskent	48.03	Çekiç Dağ Fm.	Changsingian	PS	3.52895	-5.7883	-5.7883	0.3	0.03	3	687.83	0.0015195	0.00669496	0.125606
1.5	Taskent	49.5	Çekiç Dağ Fm.	Changsingian	PS	2.38856	-6.20349	-6.20349	0.22	0.03	3	1059.56	0.00214408	0.0107308	0.0674004
2.15	Taskent	50.15	Çekiç Dağ Fm.	Changsingian	PS	3.18382	-5.8115	-5.8115	0.3	0.06	3	829.51	0.00171379	0.0170733	0.143212
2.9	Taskent	50.9	Çekiç Dağ Fm.	Griesbachian	BS	-1.28582	-6.08121	-6.08121	0.2	0.1	3	996.18	0.00197473	0.00677727	0.0616385
3.8	Taskent	51.8	Çekiç Dağ Fm.	Griesbachian	BS	-0.0299154	-6.71407	-6.71407	0.04	0.1	3	626.95	0.00123367	0.00764615	0.138165
4.15	Taskent	52.15	Gevne Fm.	Griesbachian	MS	0.440594	-6.68778	-6.68778	0.2	0.09	3	874.69	0.00166672	0.00890848	0.0871132
7.3	Taskent	55.3	Gevne Fm.	Griesbachian	MS	-0.565681	-6.74292	-6.74292	0.32	0.03	3	1554.81	0.00297499	0.00516004	0.0526123
12.3	Taskent	60.3	Gevne Fm.	Griesbachian	MS	-0.408947	-6.93953	-6.93953	-0.04	0.01	3	2618.53	0.00548559	0.00497608	0.0514092
18.1	Taskent	66.1	Gevne Fm.	Griesbachian	MS	-0.892899	-7.08902	-7.08902	0.11	0.15	3	2675.94	0.00516793	0.00446623	0.029926
27.1	Taskent	75.1	Gevne Fm.	Griesbachian	GS	-0.496567	-7.07643	-7.07643	0.13	0.1	3	3779.06	0.00685338	0.00286251	0.0119458
34.1	Taskent	82.1	Gevne Fm.	Griesbachian	GS	-0.541594	-7.25042	-7.25042	0.08	0.06	3	2929.64	0.0054359	0.00443433	0.0236999
40.1	Taskent	88.1	Gevne Fm.	Griesbachian	GS	-0.518702	-7.97095	-7.97095	0.1	0.03	3	3270.72	0.00658935	0.00391881	0.0120052
45.5	Taskent	93.5	Gevne Fm.	Griesbachian	GS	-1.24544	-7.31468	-7.31468	0.03	0.03	3	561.72	0.00108622	0.00786616	0.103572
47	Taskent	95	Gevne Fm.	Griesbachian	GS	-0.46598	-7.69627	-7.69627	-0.01	0.04	3	1301.02	0.00238686	0.00667577	0.022086
48	Taskent	96	Gevne Fm.	Griesbachian	GS	-0.58588	-7.32248	-7.32248	0.3	0.07	3
48.5	Taskent	96.5	Gevne Fm.	Griesbachian	GS	-0.58588	-7.32248	-7.32248	0.3	0.05	3
54.5	Taskent	102.5	Gevne Fm.	Griesbachian	PS	1	-7.01831	-7.01831	0.26	0.05	3	1118.42	0.00233262	0.0106895	0.247397
58.7	Taskent	106.7	Gevne Fm.	Griesbachian	MS	2.2	-7.40603	-7.40603	0.45	0.02	3
62	Taskent	110	Gevne Fm.	Griesbachian	PS	0.264257	-7.93439	-7.93439	0.56	0.27	3	1909.45	0.00443846	0.00934619	0.421467
95	Taskent	143	Gevne Fm.	Griesbachian	WS	0.264366	-7.41703	-7.41703	0.49	0.13	3	2130.49	0.00447748	0.00619167	0.113494
109	Taskent	157	Gevne Fm.	Griesbachian	MS	1.77816	-6.65135	-6.65135	0.66	0.07	3	1163.69	0.00244563	0.0757797	0.133941
136.5	Taskent	184.5	Gevne Fm.	Griesbachian	GS	0.8	-7.57036	-7.57036	0.47	0.05	3	2084.45	0.00473506	0.00352786	0.00987999
151	Taskent	199	Gevne Fm.	Griesbachian	GS	1.59469	-8.15356	-8.15356	0.88	0.02	3	1476.15
176.2	Taskent	224.2	Gevne Fm.	Griesbachian	GS	1.31311	-7.98566	-7.98566	0.51	0	3	1436.28	0.0027071	0.0199105	0.322855
207	Taskent	255	Gevne Fm.	Dienerian	GS	6.33571	-7.5295	-7.5295	0.73	0.08	3
226	Taskent	274	Gevne Fm.	Smithian	GS	2.04395	-8.35038	-8.35038	0.46	0.2	3
234	Taskent	282	Gevne Fm.	Smithian	PS	0.865507	-8.00154	-8.00154	0.22	0.3	3
287	Taskent	335	Gevne Fm.	Smithian	MS	-1.71676	-8.00712	-8.00712	0.51	0.06	3
CAF2	Geomar								1.4	0.1	15
4-c	Tesero	1.5	Bellerophon Fm.	Changsingian	PS	3.944	-7.26	-9.86	0.15	0.13	3	89.1684	0.000359254	0.513374	2.13127
4-j	Tesero	4.25	Bellerophon Fm	Changsingian	PS	3.661	-6.112	-6.112	0.3	0.2	4
4-m	Tesero	5.45	Bellerophon Fm	Changsingian	PS	4.055	-5.612	-5.612	0.32	0.2	3	385.902	0.000924107	0.0298342	0.891562
4-q	Tesero	9.95	Bellerophon Fm	Changsingian	PS	2.077	-5.666	-5.666	0.36	0.1	3	311.622	0.000719128	0.0242635	1.29447
4-t	Tesero	11	Bellerophon Fm	Changsingian	PS	1.843	-5.459	-5.459	0.35	0.14	3	317.299	0.000735717	0.0173271	1.09123
4-y	Tesero	14.05	Bellerophon Fm	Changsingian	WS	2.49	-1.82	-4.42	0.3	0.08	3
4-aa	Tesero	16.9	Bellerophon Fm	Changsingian	WS	3.02	-2.85	-5.45	0.13	0.09	3	144.903	0.000503962	0.517969	1.90732
4-ac	Tesero	17.3	Bellerophon Fm	Changsingian	PS	2.715	-5.387	-5.387	0.23	0.08	3	353.546	0.000669252	0.0119205	0.476103
4-ae	Tesero	18.6	TOH	Changsingian	OL	1.111	-5.678	-5.678	-0.01	0.06	3	189.157	0.00048995	0.0114605	0.711152
4-af	Tesero	18.9	TOH	Changsingian	OL	2.254	-7.346	-7.346	0.23	0.08	3	1586.63	0.00313272	0.00650809	0.799116
4-ah	Tesero	20.3	TOH	Changsingian	OL	0.464	-6.206	-6.206	0.03	0.08	3	851.016	0.00167323	0.00947117	0.411509
4-am	Tesero	22.65	TOH	Changsingian	OL	0.348	-7.274	-7.274	0.23	0.04	3	292.867	0.000561233	0.0617175	0.150626
4-an	Tesero	22.9	TOH	Changsingian	OL	0.045	-6.24	-6.24	-0.07	0.04	3	534.349	0.00112619	0.0159033	1.14957
4-ao	Tesero	23.25	TOH	Changsingian	OL	0.09	-7.21	-7.21	0.13	0.07	3	445.857	0.000924629	0.0625234	0.310074
4-ap	Tesero	23.7	TOH	Changsingian	OL	0.389	-6.169	-6.169	-0.07	0.01	2	1332.47	0.00289284	0.0094839	0.622268
5-u	Tesero	25	Werfen Fm.	Griesbachian	GS	-1.65	-5.741	-5.741	0.23	0.1	3	175.242	0.00053546	0.159738	0.0950167
5-x	Tesero	26.45	Werfen Fm.	Griesbachian	GS	-3.7	-5.41	-5.41	0.23	0.1	2	276.354	0.000947624	0.0468064	3.9891
5-z	Tesero	29.5	Werfen Fm.	Griesbachian	MS	-1.94	-5.46	-5.46	0.13	0.07	3				1.50273
5-p	Tesero	44.7	Werfen Fm.	Griesbachian	MS	-2.18	-6.56	-6.56	0.2	0.07	3	335.139	0.00090588	0.0629694
5-a	Tesero	90	Werfen Fm.	Dinerian	GS	1.168	-6.437	-6.437	-0.07	0.07	3	2512.25	0.00525228	0.0120884	0.869088
5-h	Tesero	106	Werfen Fm.	Dinerian	GS	0.718	-6.416	-6.416	-0.07	0	2	994.085	0.00185583	0.00987439	0.13762
BSE	Berkeley								1.1	0.1	5
Table 1. Lithological, elemental and isotopic data of the studied carbonate sucessions.
PG = Packstone-Grainstone
PS= Packstone
Ws= Packstone
Ms= Mudstone
Ol= Oolithe
BRCA= Breccia
TH+ Trombolithe

## Sheet: Table DR2
Silva-Tamayo, J.C., Lau, K.V., Jost, A.B., Payne, J.L., Wignall, P.B., Newton, R.J., Eisenhauer, A., Depaolo, D.J., Brown, S., Maher, K., Lehrmann, D.J., Altiner, D., Yu, M., Richoz, S., and Paytan, A., 2018, Global perturbation of the marine calcium cycle during the Permian-Triassic transition: GSA Bulletin, https://doi.org/10.1130/B31818.1.
GSA Data Repository Item 2018081
Table DR2. Carbon and calcium model parameters, following Jost et al. (2017) with references therein.
		Carbon	δ13C	Ca	δ44/40Ca
Reservoirs (mol) and isotopic compositions (‰)
		3.28 x 1018	2	2.05 x 1019	-0.3
Fluxes and (mol/yr) isotopic compositions (‰)
Fwcarb	carbonate weathering	1.93 x 1013	3.7	1.93 x 1013	-0.4
Fworg	organic carbon weathering	5.75 x 1012	-26.3	--	--
Fvolc	volcanism	2.00 x 1013	-5	--	--
Fborg	organic carbon burial	9.00 x 1012	-28	--	--
Fbcarb	carbonate burial	3.60 x 1013	2	3.60 x 1013	-0.3
Fwsil	silicate weathering	--	--	1.18 x 1013	-0.18
Fractionation factors (‰)
Δorg	organic carbon production	--	30	--	--
Δbcarb	carbonate precipitation	--	--	--	1.2
